# Supplementary material for: Lactate Activates the E2F Pathway to Promote Cell Motility by Up-Regulating Microtubule Modulating Genes
Source: PubMed Central journal article supplement (PMC6468617; doi:10.3390/cancers11030274), 2019-02-26
Supplement: cancers-11-00274-s001.pdf [file cancers-11-00274-s001.pdf]

# Supplementary materials: Lactate Activates E2F Pathway to Promote Cell Motility by Up-Regulating Microtubule Modulating Genes

Yi-deun Jung, Jung Hee Cho, Seulki Park, Minh Kang, Seung-jin Park, Dong Hee Choi, Moonkyung Jeong, Kyung Chan Park, Young Il Yeom and Dong Chul Lee

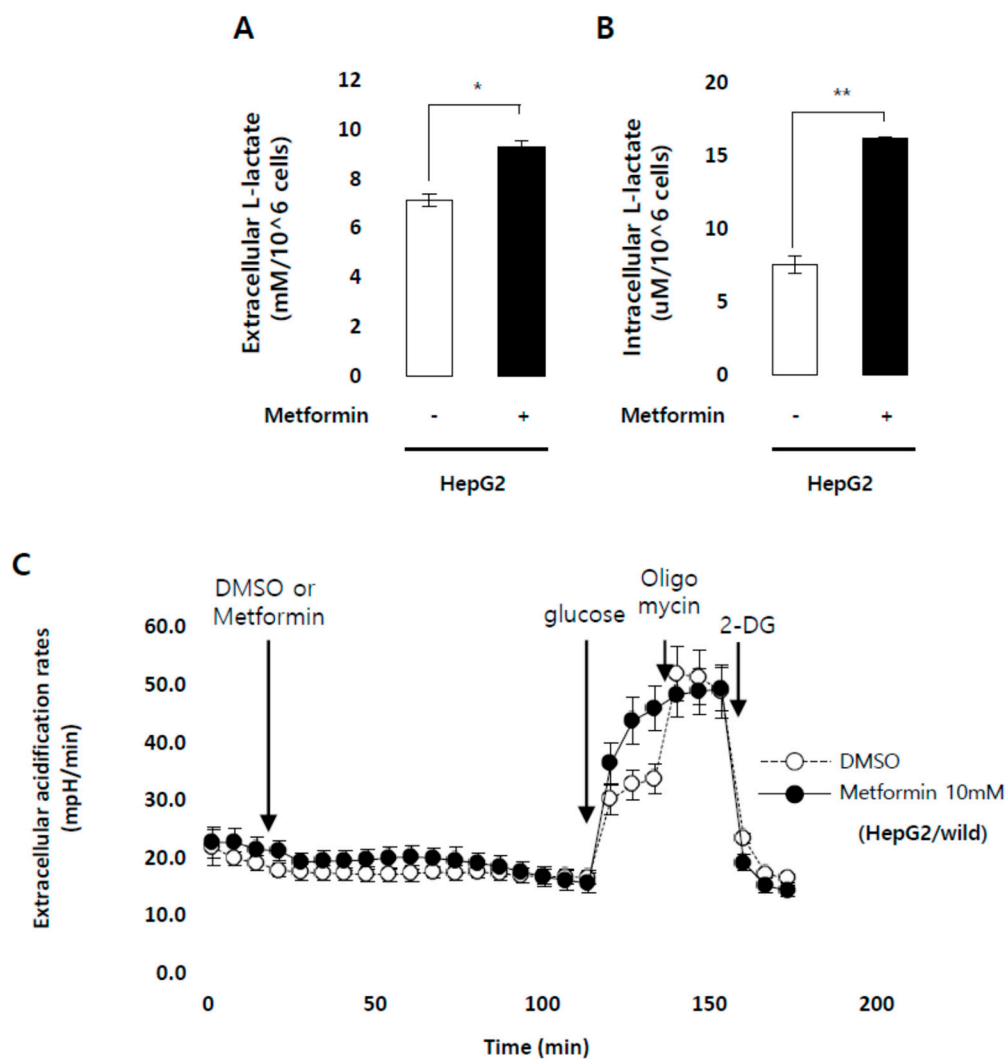

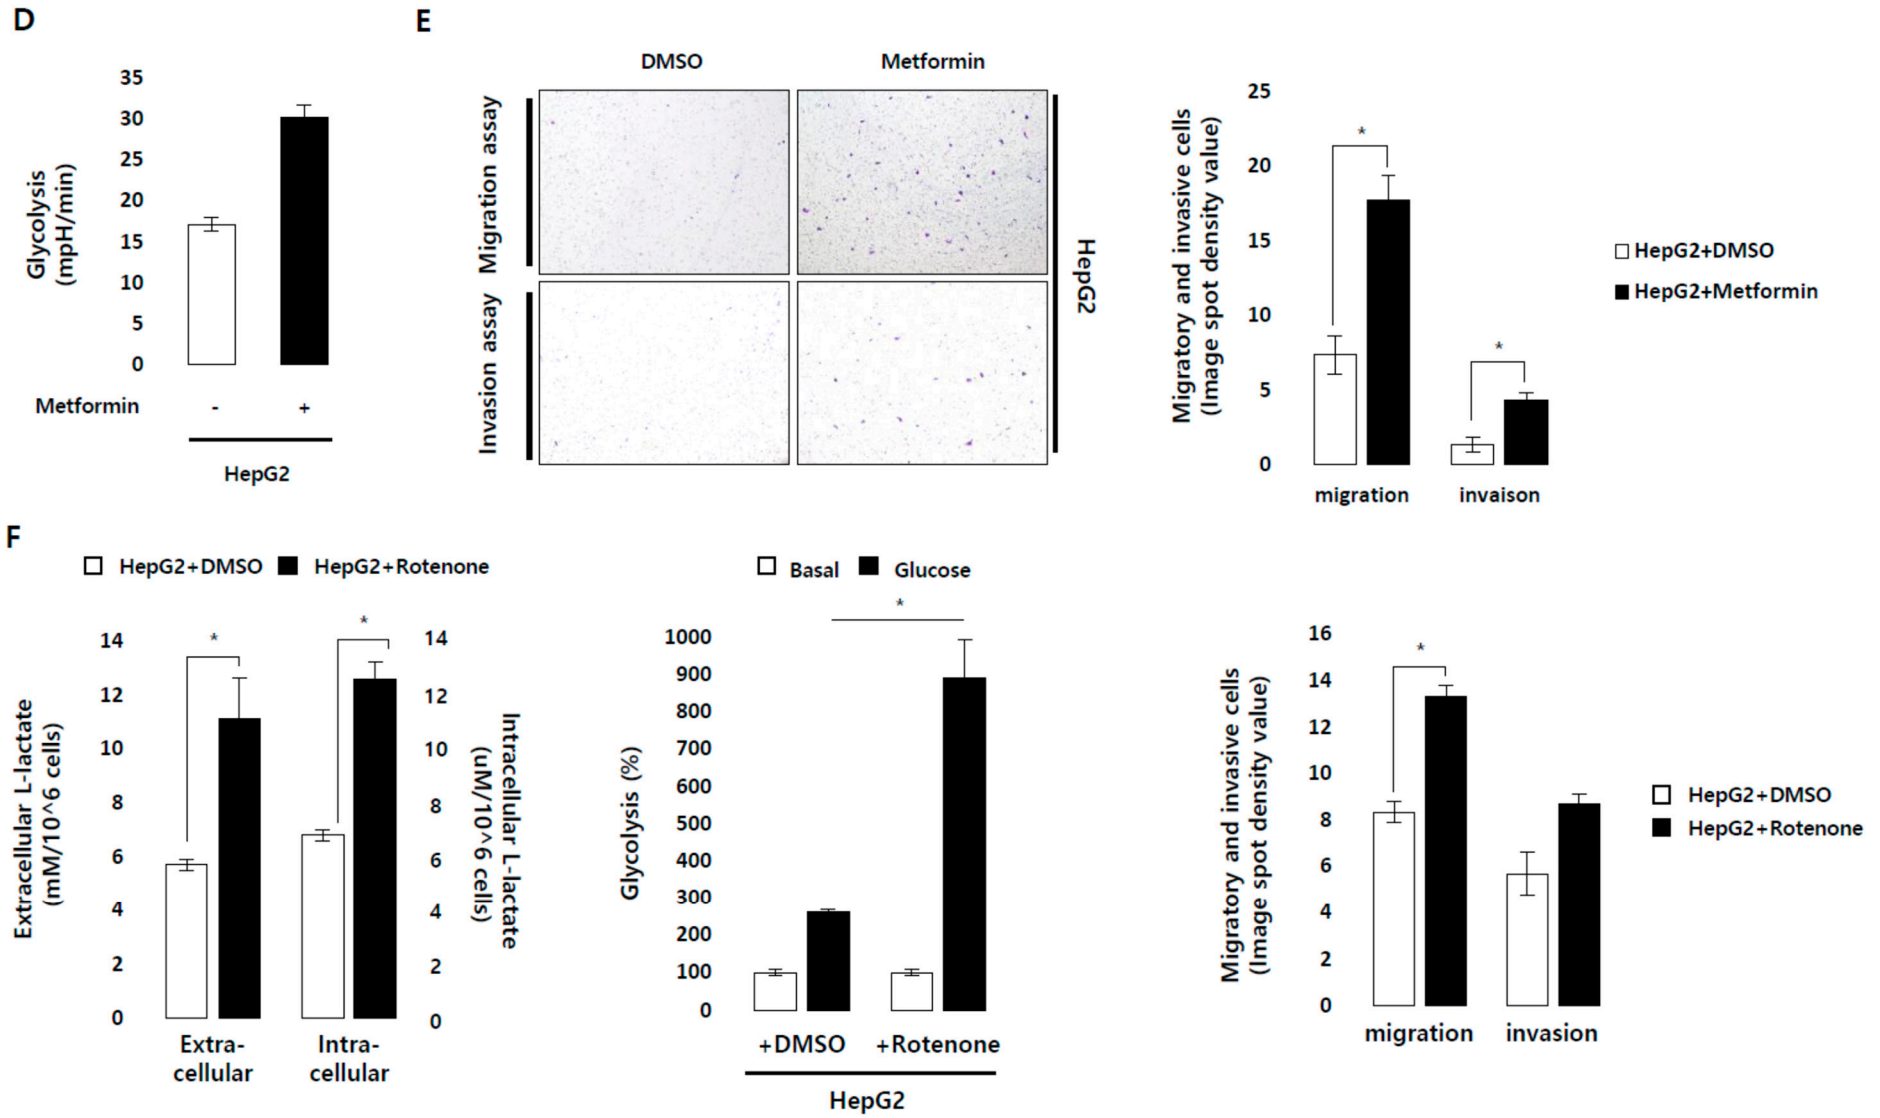

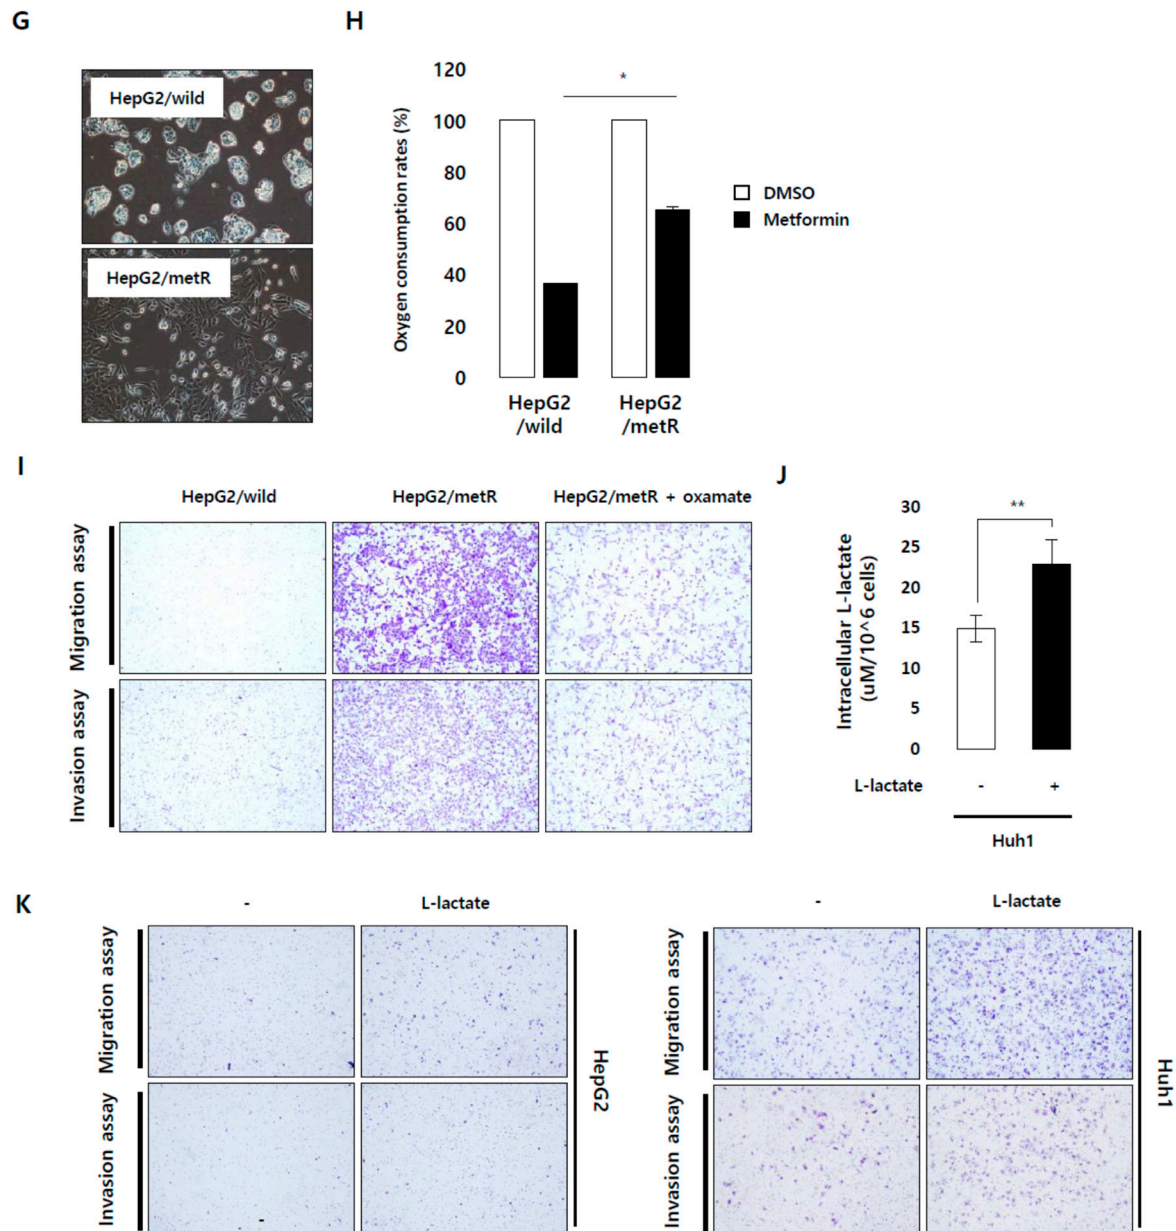

**Figure S1.** Lactate-enriched microenvironment affects migratory and invasive properties in hepatocellular carcinoma cells. (A,B). Extra- and intra-cellular lactate production by HepG2 cells after transient treatment with metformin (10 mM). (C) Kinetic ECAR response of HepG2 cells to metformin (10 mM) or DMSO, glucose (20 mM), oligomycin (1  $\mu$ M), and 2-DG (50 mM), respectively. The ECAR values were normalized by the BCA protein assay. (D) Glycolysis rates measured after the addition of a saturating amount of glucose to DMSO- or metformin-treated HepG2 cells. (E) Changes in migratory and invasive properties induced in HepG2 cells after a transient treatment with metformin. Experiments were conducted in triplicates, and the image data shown represent a typical experiment. Results from three independent experiments are shown as mean  $\pm$  SD. (F) Changes in lactate production, glycolysis rates, and migratory properties in HepG2 cells after a transient treatment with rotenone (2  $\mu$ M). DMSO was used for the control. The ECAR values, which represents cellular glycolysis rates, were normalized by BCA protein assay, and presented as the percentage increase relative to the basal ECAR value for DMSO- or rotenone-treated condition. (G) Morphological changes induced in a hyper-glycolytic model of HepG2 cells that acquired a long-term resistance to metformin (HepG2/metR). They typically showed features of flat, large, and irregular shapes in contrast to parental HepG2 cells. (H) Oxygen consumption rates of HepG2 and HepG2/metR cells treated with metformin (10 mM). The OCR values were normalized by BCA protein assay. Metformin-induced change in OCR is presented as the percentage relative to the basal OCR value of each cell

type (DMSO). (I) Enhanced migration and invasion properties of HepG2/metR cells are abrogated by oxamate treatment. Data for parental HepG2 cells are shown for comparison. Experiments were conducted in triplicates, and the data shown represent a typical experiment. (J) Intracellular lactate level measured after a transient treatment of exogenous L-lactate (30 mM) in Huh1 cells. Results from three independent experiments are shown as mean  $\pm$  SD. (K) Changes in migratory and invasive properties induced in HepG2 and Huh1 cells after a transient treatment with exogenous L-lactate. Experiments were conducted in triplicates, and the data shown represent a typical experiment. \*  $p < 0.05$  and \*\*  $p < 0.01$  vs. control. Magnification for subfigure E,G,I,K:  $\times 40$ .

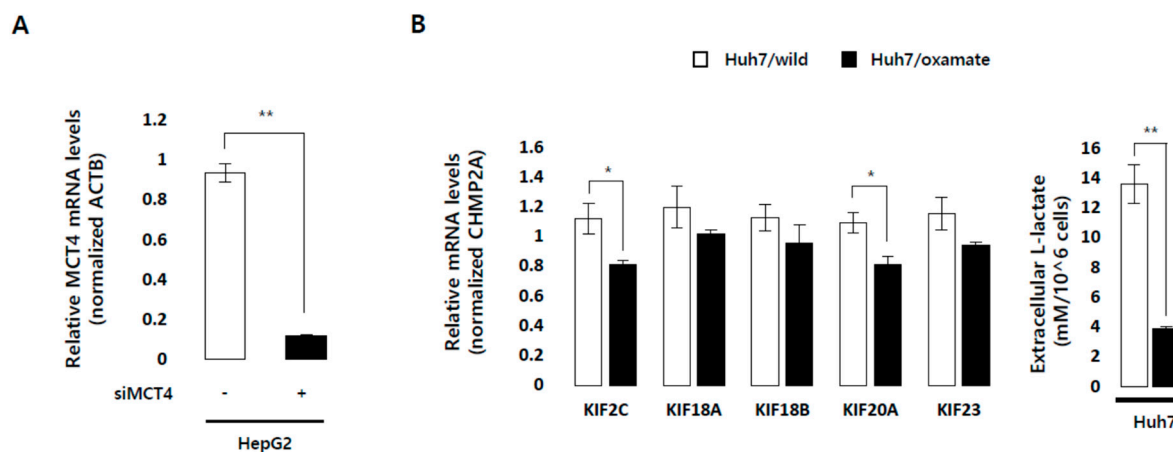

**Figure S2.** Lactate-dependent expression of kinesin family genes. (A) siRNA-mediated depletion of MCT4 gene expression in HepG2 cells. (B) Changes in mRNA expression levels of kinesin family genes were quantitatively measured in Huh7 cells after oxamate treatment. Changes in extracellular lactate concentration due to the oxamate treatment are shown on the right. Results from three independent experiments are shown as mean  $\pm$  SD. For qRT-PCR the expression level of transcripts for each gene was normalized by Ct-value of CHMP2A. The  $p$ -value was assessed by Student's  $t$ -test. \*  $p < 0.05$  and \*\*  $p < 0.01$  vs. control.

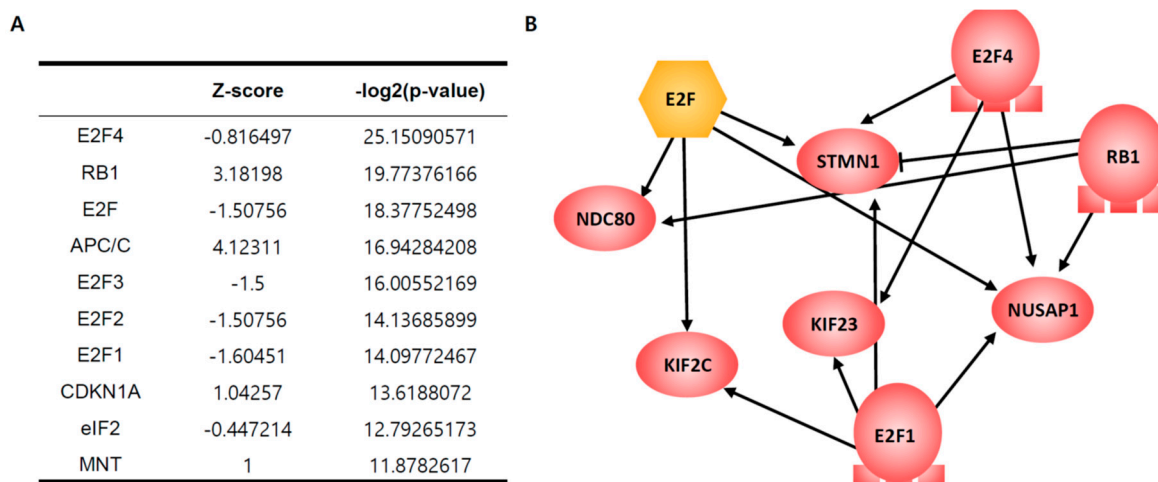

**Figure S3.** Identification of E2F-RB pathway as the dominant upstream regulator of lactate-responsive gene expression. (A) Profiling of upstream regulators of lactate-induced gene expression in oxamate-treated HepG2/metR cells through a sub-network enrichment analysis. The activation scores (Z-score) for putative upstream regulators and their statistical significance are shown. (B) Identification of E2F-RB pathway as the upstream regulator of the eleven lactate-responsive genes involved in microtubule regulation through the literature mining process of Pathway Studio.

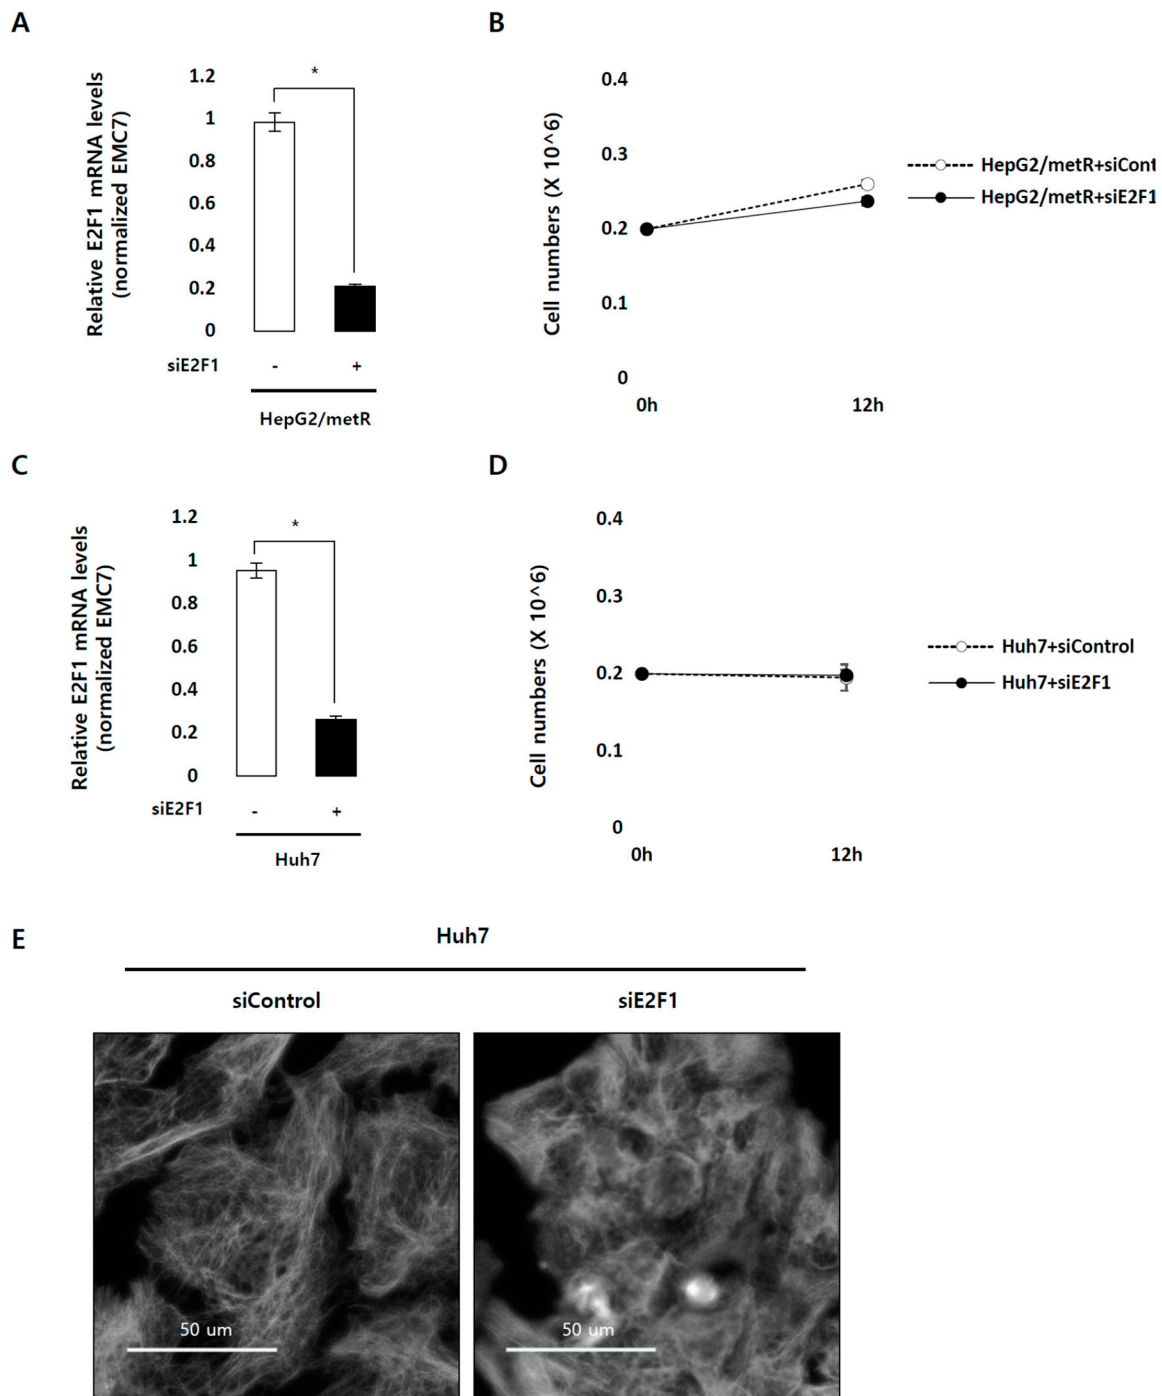

**Figure S4.** siRNA-mediated knockdown of E2F1 expression and its effects on microtubule dynamics. (A) siRNA-mediated knockdown of E2F1 expression in HepG2/metR cells. (B) Cell growth profiles of control or E2F1-depleted HepG2/metR cells during migration and invasion assays (12 h). (C) siRNA-mediated knockdown of E2F1 expression in Huh7 cells. (D) Cell growth profiles of control or E2F1-depleted Huh7 cells. (A,C) For qRT-PCR the expression level of transcripts for each gene was normalized by Ct-value of EMC7. Results from three independent experiments are shown as mean  $\pm$  SD. The *p*-value was assessed by Student's *t*-test. (E) Immunofluorescence imaging of  $\alpha$ -tubulin protein (white) in E2F1-depleted Huh7 cells. Experiments were conducted in triplicates, and the data shown represent a typical experiment. \* *p* < 0.05 vs. control.

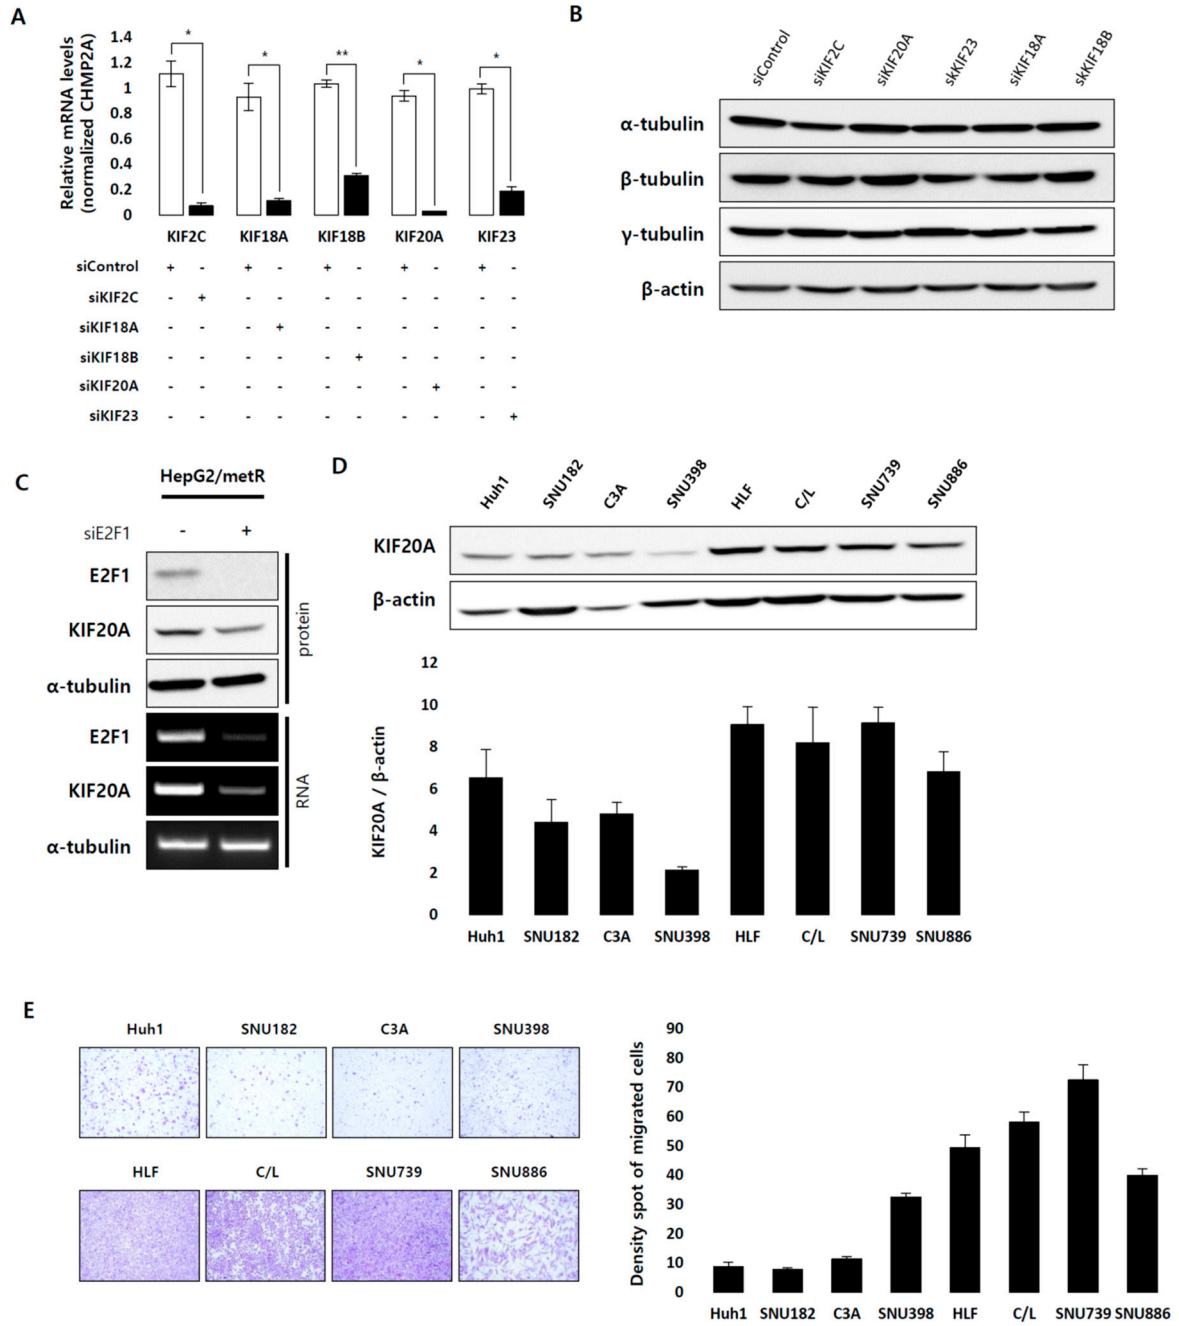

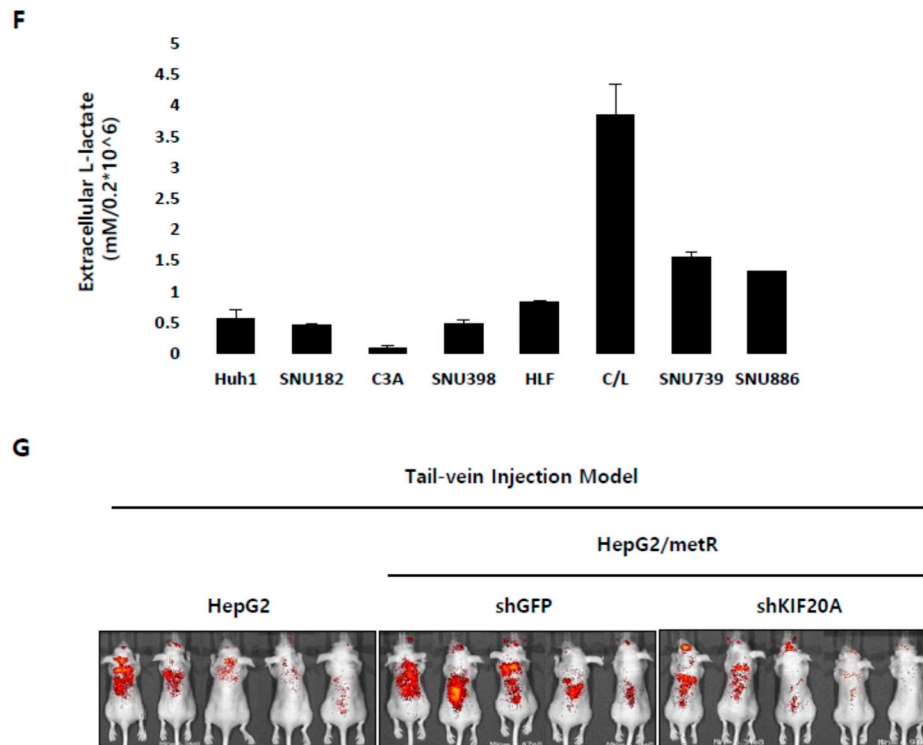

**Figure S5.** Roles of kinesin family genes in the regulation of microtubule dynamics and lactate-induced cell motility. **(A)** Verification of siRNA-mediated depletion of kinesin family gene expression in HepG2/metR cells by qRT-PCR. For qRT-PCR the expression level of transcripts for each kinesin gene was normalized by Ct-value of CHMP2A. Results from three independent experiments are shown as mean  $\pm$  SD. The *p*-value was assessed by Student's *t*-test. **(B)** Examination of the effects of kinesin gene depletion on the expression of different tubulins in HepG2/metR cells. Protein expression of tubulin family genes was estimated by Western blotting. **(C)** Protein and mRNA expression of KIF20A in E2F1-depleted HepG2/metR cells. Experiments were conducted in triplicates, and the data shown represent a typical experiment. **(D)** KIF20A protein expression in eight different liver cancer cell lines was estimated by Western blotting followed by densitometry. **(E)** Estimation of the relative migration capacity of eight different liver cancer cell lines. Magnification: 40 $\times$ . **(F)** Extracellular lactate levels measured in eight different liver cancer cell lines. Results from three independent experiments are shown as mean  $\pm$  SD. **(G)** Tracking of metastasizing liver cancer cells in live mice using a live imaging software. Imaging was carried out after 2 weeks of cell injection into the tail vein of BALB/c-nude mice. \* *p* < 0.05 and \*\* *p* < 0.01 vs. control.

**Table S1.** List of the genes directly responding to lactate signaling.

| Gene Symbol | Ensembl ID (or Entrez Gene) | Gene Name                                                              | HepG2/wild-HepG2/metR<br>Log <sub>2</sub> Fold Change | HepG2/metR-HepG2/metR+Oxamate<br>Log <sub>2</sub> Fold Change |
|-------------|-----------------------------|------------------------------------------------------------------------|-------------------------------------------------------|---------------------------------------------------------------|
| SRGN        | ENSG00000122862             | Serglycin                                                              | 8.663534                                              | -0.70503616                                                   |
| ANXA1       | ENSG00000135046             | Annexin A1                                                             | 7.9717927                                             | -0.7499008                                                    |
| G0S2        | ENSG00000123689             | G0/G1 Switch 2                                                         | 7.180892                                              | -0.68959665                                                   |
| PLP2        | ENSG00000102007             | Proteolipid Protein 2                                                  | 6.461257                                              | -0.5630083                                                    |
| KRTAP2-3    | ENSG00000212724             | Keratin Associated Protein 2-3                                         | 6.4068155                                             | -1.234129                                                     |
| NRG1        | ENSG00000157168             | Neuregulin 1                                                           | 5.9283357                                             | -0.5623679                                                    |
| SLC43A3     | ENSG00000134802             | Solute Carrier Family 43 Member 3                                      | 5.9182715                                             | -0.73265934                                                   |
| MYEOV       | ENSG00000172927             | Myeloma Overexpressed                                                  | 5.56702                                               | -0.7658987                                                    |
| MOK         | ENSG00000080823             | MOK Protein Kinase                                                     | 5.477459                                              | -0.52942085                                                   |
| SNHG15      | ENSG00000232956             | Small Nucleolar RNA Host Gene 15                                       | 5.134816                                              | -1.0345192                                                    |
| FOXD1       | ENSG00000251493             | Forkhead Box D1                                                        | 4.8395553                                             | -0.541657                                                     |
| CD82        | ENSG00000085117             | CD82 Molecule                                                          | 4.770322                                              | -0.6132164                                                    |
| PLAT        | ENSG00000104368             | Plasminogen Activator, Tissue Type                                     | 4.633147                                              | -0.50059414                                                   |
| CHAC1       | ENSG00000128965             | ChaC Glutathione Specific Gamma-Glutamylcyclotransferase 1             | 4.455889                                              | -2.2658846                                                    |
| PLAU        | ENSG00000122861             | Plasminogen Activator, Urokinase                                       | 4.341663                                              | -1.2562137                                                    |
| TGM2        | ENSG00000198959             | Transglutaminase 2                                                     | 4.299946                                              | -0.54446316                                                   |
| SPARC       | ENSG00000113140             | Secreted Protein Acidic And Cysteine Rich                              | 4.2835507                                             | -0.55296993                                                   |
| RPL21       | ENSG00000122026             | Ribosomal Protein L21                                                  | 4.234487                                              | -0.9239664                                                    |
| IFI27L2     | ENSG00000119632             | Interferon Alpha Inducible Protein 27 Like 2                           | 4.1375957                                             | -0.56406116                                                   |
| BIRC3       | ENSG00000234445             | Baculoviral IAPBaculoviral IAP Repeat Containing 3 Repeat Containing 3 | 4.019673                                              | -0.5170846                                                    |
| FOSL1       | ENSG00000175592             | FOS Like 1, AP-1 Transcription Factor Subunit                          | 3.947637                                              | -0.7359171                                                    |
| SHISA2      | ENSG00000180730             | Shisa Family Member 2                                                  | 3.853442                                              | -0.5062511                                                    |
| INSIG1      | ENSG00000186480             | Insulin Induced Gene 1                                                 | 3.8162234                                             | -1.1338937                                                    |
| SOCS3       | ENSG00000184557             | Suppressor Of Cytokine Signaling 3                                     | 3.7340534                                             | -0.50167465                                                   |
| RIMKLB      | ENSG00000166532             | Ribosomal Modification Protein RimK Like Family Member B               | 3.5299654                                             | -0.5982802                                                    |
| PLAUR       | ENSG00000011422             | Plasminogen Activator, Urokinase Receptor                              | 3.4646206                                             | -0.51312256                                                   |
| TUBB6       | ENSG00000176014             | Tubulin Beta 6 Class V                                                 | 3.4066448                                             | -0.6411624                                                    |
| WDR54       | ENSG00000005448             | WD Repeat Domain 54                                                    | 3.3614988                                             | -0.9210162                                                    |
| UAP1        | ENSG00000117143             | UDP-N-Acetylglucosamine Pyrophosphorylase 1                            | 3.1766644                                             | -0.8585243                                                    |
| HAS3        | ENSG00000103044             | Hyaluronan Synthase 3                                                  | 3.0806127                                             | -0.5995364                                                    |
| ULBP1       | ENSG00000111981             | UL16 Binding Protein 1                                                 | 3.0395777                                             | -0.70952964                                                   |
| C15orf48    | ENSG00000166920             | Chromosome 15 Open Reading Frame 48                                    | 3.020333                                              | -0.6276443                                                    |
| CLDN10      | ENSG00000134873             | Claudin 10                                                             | 2.9294827                                             | -0.591835                                                     |
| FLJ23867    | Entrez Gene:200058          | Uncharacterized Protein FLJ23867                                       | 2.8299212                                             | -0.7818744                                                    |
| SNORA70     | ENSG00000207165             | Small Nucleolar RNA, H/ACA Box 70                                      | 2.81736                                               | -1.902751                                                     |



|              |                       |                                                              |           |             |
|--------------|-----------------------|--------------------------------------------------------------|-----------|-------------|
| LINC01279    | Entrez Gene:100506621 | Long Intergenic Non-Protein Coding RNA 1279                  | 2.7018592 | -0.5433452  |
| RRAS         | ENSG00000126458       | RAS Related                                                  | 2.6430616 | -0.52122164 |
| KRT15        | ENSG00000171346       | Keratin 15                                                   | 2.637089  | -0.5660372  |
| NRGN         | ENSG00000154146       | Neurogranin                                                  | 2.6237876 | -0.6923499  |
| UBE2S        | ENSG00000108106       | Ubiquitin Conjugating Enzyme E2 S                            | 2.619019  | -0.5673156  |
| FLJ45513     | ENSG00000204584       | Uncharacterized LOC729220                                    | 2.6142166 | -0.6827209  |
| CXCL2        | ENSG00000081041       | C-X-C Motif Chemokine Ligand 2                               | 2.5624237 | -1.4232312  |
| LEPR         | ENSG00000116678       | Leptin Receptor                                              | 2.505877  | -0.50919724 |
| RDM1         | ENSG00000278023       | RAD52 Motif Containing 1                                     | 2.472673  | -0.61161304 |
| APOBEC3B     | ENSG00000179750       | Apolipoprotein B mRNA Editing Enzyme Catalytic Subunit 3B    | 2.461593  | -0.7941332  |
| ANGPTL4      | ENSG00000167772       | Angiopoietin Like 4                                          | 2.440999  | -1.1044414  |
| C8orf46      | ENSG00000169085       | Vexin                                                        | 2.281881  | -0.66461015 |
| CARS         | ENSG00000110619       | CysteinyI-TRNA Synthetase                                    | 2.247805  | -0.66027355 |
| LFNG         | ENSG00000106003       | LFNG O-Fucosylpeptide 3-Beta-N-Acetylglucosaminyltransferase | 2.2101269 | -0.6740203  |
| WDR76        | ENSG00000092470       | WD Repeat Domain 76                                          | 2.177379  | -0.61951613 |
| CCDC74A      | ENSG00000163040       | Coiled-Coil Domain Containing 74A                            | 2.1341832 | -0.5484978  |
| NBL1         | ENSG00000158747       | NBL1, DAN Family BMP Antagonist                              | 1.9864647 | -0.92279935 |
| LGALS1       | ENSG00000100097       | Galectin 1                                                   | 1.9608679 | -0.66515255 |
| KIF18A       | ENSG00000121621       | Kinesin Family Member 18A                                    | 1.9236305 | -0.50712156 |
| UCP2         | ENSG00000175567       | Uncoupling Protein 2                                         | 1.9134188 | -1.3448291  |
| MIR17HG      | ENSG00000215417       | MiR-17-92a-1 Cluster Host Gene                               | 1.8753912 | -0.514632   |
| TMEM161B-AS1 | ENSG00000247828       | TMEM161B Antisense RNA 1                                     | 1.8367593 | -1.198487   |
| KIF23        | ENSG00000137807       | Kinesin Family Member 23                                     | 1.8086615 | -0.64275074 |
| CATSPER1     | ENSG00000175294       | Cation Channel Sperm Associated 1                            | 1.7882096 | -0.6271752  |
| STMN1        | ENSG00000117632       | Stathmin 1                                                   | 1.7763343 | -0.6696081  |
| FAM72B       | ENSG00000188610       | Family With Sequence Similarity 72 Member B                  | 1.7376454 | -0.6952479  |
| CENPI        | ENSG00000102384       | Centromere Protein I                                         | 1.7014825 | -0.53399706 |
| SLMO2-ATP5E  | Entrez Gene:100533975 | SLMO2-ATP5E Readthrough                                      | 1.6976035 | -0.630363   |
| NUSAP1       | ENSG00000137804       | Nucleolar And Spindle Associated Protein 1                   | 1.6951275 | -0.52922344 |
| MSH5-SAPCD1  | ENSG00000255152       | MSH5-SAPCD1 Readthrough (NMD Candidate)                      | 1.6527612 | -0.82210636 |
| PTTG1        | ENSG00000164611       | Pituitary Tumor-Transforming 1                               | 1.6005845 | -0.7480469  |
| FAM64A       | ENSG00000129195       | PICALM Interacting Mitotic Regulator                         | 1.599808  | -0.6055293  |
| FANCI        | ENSG00000140525       | FA Complementation Group I                                   | 1.513165  | -0.64473104 |
| RNU6ATAC     | ENSG00000221676       | RNA, U6atac Small Nuclear (U12-Dependent Splicing)           | 1.5082383 | -1.1415639  |
| ITGA6        | ENSG00000091409       | Integrin Subunit Alpha 6                                     | 1.5013771 | -0.5040817  |
| EBNA1BP2     | ENSG00000117395       | EBNA1 Binding Protein 2                                      | 1.4999957 | -0.57117844 |
| LOC103021295 | Entrez Gene:103021295 | Uncharacterized LOC103021295                                 | 1.4921154 | -1.6693618  |
| PKI55        | ENSG00000260804       | Long Intergenic Non-Protein Coding RNA 1963                  | 1.4866606 | -0.7485008  |
| NME1-NME2    | ENSG00000011052       | NME1-NME2 Readthrough                                        | 1.4815836 | -1.7292972  |

|                |                       |                                                       |           |             |
|----------------|-----------------------|-------------------------------------------------------|-----------|-------------|
| CIT            | ENSG00000122966       | Citron Rho-Interacting Serine/Threonine Kinase        | 1.4401348 | -0.5243051  |
| TK1            | ENSG00000167900       | Thymidine Kinase 1                                    | 1.4356728 | -1.0613041  |
| SFN            | ENSG00000175793       | Stratifin                                             | 1.4122744 | -0.5776167  |
| NBPF25P        | ENSG00000272150       | NBPF Member 25, Pseudogene                            | 1.4101803 | -0.6656171  |
| TIMM10         | ENSG00000134809       | Translocase Of Inner Mitochondrial Membrane 10        | 1.3986549 | -0.71706486 |
| TAF15          | ENSG00000270647       | TATA-Box Binding Protein Associated Factor 15         | 1.3981676 | -0.6371021  |
| AP2S1          | ENSG00000042753       | Adaptor Related Protein Complex 2 Subunit Sigma 1     | 1.3979273 | -0.59551096 |
| CCNE2          | ENSG00000175305       | Cyclin E                                              | 1.3833754 | -0.58780575 |
| RACGAP1        | ENSG00000161800       | Rac GTPase Activating Protein 1                       | 1.3817348 | -0.56450415 |
| ASNS           | ENSG00000070669       | Asparagine Synthetase (Glutamine-Hydrolyzing)         | 1.3765383 | -0.5224061  |
| KIF18B         | ENSG00000186185       | Kinesin Family Member 18B                             | 1.3718948 | -0.6087103  |
| EXOSC5         | ENSG00000077348       | Exosome Component 5                                   | 1.3604612 | -0.52586985 |
| IQGAP3         | ENSG00000183856       | IQ Motif Containing GTPase Activating Protein 3       | 1.3459537 | -0.504246   |
| HPRT1          | ENSG00000165704       | Hypoxanthine Phosphoribosyltransferase 1              | 1.3439608 | -0.5530338  |
| CDC20          | ENSG00000117399       | Cell Division Cycle 20                                | 1.3311977 | -1.0260725  |
| FAM111B        | ENSG00000189057       | amily With Sequence Similarity 111 Member B           | 1.2990503 | -0.78210616 |
| CD151          | ENSG00000177697       | CD151 Molecule (Raph Blood Group)                     | 1.2954721 | -0.51596546 |
| KNSTRN         | ENSG00000128944       | Kinetochores Localized Astrin (SPAG5) Binding Protein | 1.288887  | -0.5405283  |
| NUF2           | ENSG00000143228       | NUF2, NDC80 Kinetochores Complex Component            | 1.2869172 | -0.62100697 |
| EFHD2          | ENSG00000142634       | EF-Hand Domain Family Member D2                       | 1.2579031 | -0.67007494 |
| ITGB3BP        | ENSG00000142856       | ntegrin Subunit Beta 3 Binding Protein                | 1.2441993 | -0.51290464 |
| KIF2C          | ENSG00000142945       | Kinesin Family Member 2C                              | 1.2170086 | -0.68559694 |
| HCFC1R1        | ENSG00000103145       | Host Cell Factor C1 Regulator 1                       | 1.2103913 | -0.72119904 |
| DDIT3          | ENSG00000175197       | DNA Damage Inducible Transcript 3                     | 1.201889  | -1.4629793  |
| TMPO-AS1       | ENSG00000257167       | TMPO Antisense RNA 1                                  | 1.1880759 | -1.2009901  |
| H3F3AP4        | ENSG00000235655       | H3 Histone, Family 3A, Pseudogene 4                   | 1.1790832 | -2.053651   |
| TOB2P1         | ENSG00000176933       | Transducer Of ERBB2, 2 Pseudogene 1                   | 1.17452   | -0.6659017  |
| PAGE1          | ENSG00000068985       | PAGE Family Member 1                                  | 1.1718446 | -0.68176055 |
| FABP5          | ENSG00000164687       | Fatty Acid Binding Protein 5                          | 1.1528816 | -0.85995007 |
| LAS1L          | ENSG00000001497       | LAS1 Like, Ribosome Biogenesis Factor                 | 1.1472235 | -0.52020025 |
| HAUS7          | ENSG00000213397       | HAUS Augmin Like Complex Subunit 7                    | 1.1414261 | -0.5131812  |
| HJURP          | ENSG00000123485       | Holliday Junction Recognition Protein                 | 1.1292663 | -0.72957325 |
| MCM6           | ENSG00000076003       | Minichromosome Maintenance Complex Component 6        | 1.119534  | -0.8125825  |
| POLA1          | ENSG00000101868       | DNA Polymerase Alpha 1, Catalytic Subunit             | 1.1152444 | -0.931638   |
| SERF2-C15ORF63 | Entrez Gene:100529067 | SERF2-C15orf63 Readthrough                            | 1.1128592 | -1.8926823  |
| ATG3           | ENSG00000144848       | Autophagy Related 3                                   | 1.1122737 | -0.60944414 |
| E2F8           | ENSG00000129173       | E2F Transcription Factor 8                            | 1.1110861 | -0.56246686 |
| PGK1           | ENSG00000102144       | Phosphoglycerate Kinase 1                             | 1.1066875 | -0.7288847  |
| PSRC1          | ENSG00000134222       | Proline And Serine Rich Coiled-Coil 1                 | 1.1043298 | -0.75656366 |

|           |                 |                                                                                                         |           |             |
|-----------|-----------------|---------------------------------------------------------------------------------------------------------|-----------|-------------|
| LINC00941 | ENSG00000235884 | Long Intergenic Non-Protein Coding RNA 941                                                              | 1.1040186 | -0.6149818  |
| SESN2     | ENSG00000130766 | Sestrin 2                                                                                               | 1.097506  | -1.0312753  |
| RFESD     | ENSG00000175449 | Rieske Fe-S Domain Containing                                                                           | 1.095147  | -0.56969726 |
| YARS      | ENSG00000134684 | Tyrosyl-TRNA Synthetase                                                                                 | 1.0863867 | -0.8222084  |
| SPA17     | ENSG00000064199 | Sperm Autoantigenic Protein 17                                                                          | 1.0854797 | -0.6276326  |
| KIF20A    | ENSG00000112984 | Kinesin Family Member 20A                                                                               | 1.0812011 | -0.6162262  |
| SKA2      | ENSG00000182628 | Spindle And Kinetochore Associated Complex Subunit 2                                                    | 1.0760107 | -0.691      |
| PPP1R14B  | ENSG00000173457 | Protein Phosphatase 1 Regulatory Inhibitor Subunit 14B                                                  | 1.0749106 | -0.85723734 |
| ANAPC15   | ENSG00000173457 | Anaphase Promoting Complex Subunit 15                                                                   | 1.0708952 | -0.70507336 |
| CDCA3     | ENSG00000111665 | Cell Division Cycle Associated 3                                                                        | 1.065907  | -0.9970088  |
| MTHFD2    | ENSG00000065911 | Methylenetetrahydrofolate Dehydrogenase (NADP+ Dependent) 2,<br>Methenyltetrahydrofolate Cyclohydrolase | 1.0653872 | -0.7614031  |
| RHEBL1    | ENSG00000167550 | RHEB Like 1                                                                                             | 1.0574455 | -0.50987935 |
| MSH5      | ENSG00000204410 | MutS Homolog 5                                                                                          | 1.0536244 | -0.6192504  |
| GARS      | ENSG00000106105 | Glycyl-TRNA Synthetase                                                                                  | 1.0456743 | -0.6545992  |
| HIST1H2AH | ENSG00000274997 | Histone Cluster 1 H2A Family Member H                                                                   | 1.0428671 | -0.9570452  |
| C21orf58  | ENSG00000160298 | Chromosome 21 Open Reading Frame 58                                                                     | 1.0424036 | -0.51380897 |
| HSPB11    | ENSG00000081870 | Heat Shock Protein Family B (Small) Member 11                                                           | 1.0314069 | -0.581501   |
| MAGOHB    | ENSG00000111196 | Mago Homolog B, Exon Junction Complex Subunit                                                           | 1.0288863 | -0.71507716 |
| NCAPD2    | ENSG00000010292 | Non-SMC Condensin I Complex Subunit D2                                                                  | 1.0174556 | -0.5655904  |
| RAC1      | ENSG00000136238 | Rac Family Small GTPase 1                                                                               | 1.012918  | -0.5034852  |
| PRC1      | ENSG00000198901 | Protein Regulator Of Cytokinesis 1                                                                      | 1.0084558 | -0.5724373  |
| NDC80     | ENSG00000080986 | NDC80, Kinetochore Complex Component                                                                    | 1.0041885 | -0.77643156 |
| PSIP1     | ENSG00000164985 | PC4 And SFRS1 Interacting Protein 1                                                                     | 1.0004644 | -0.6289239  |

**Table S2.** Univariate analysis of variables associated with E2F1 activity in TCGA LIHC cohort.

| Variable    | Total | E2F1_High (%) | OR [95%CI]       | RR [95%CI]       | p-value |
|-------------|-------|---------------|------------------|------------------|---------|
| Sex         |       |               |                  |                  |         |
| male        | 251   | 114 (45%)     | 0.57 [0.36–0.88] | 0.76 [0.62–0.93] | 0.0149  |
| female      | 121   | 72 (60%)      | 1                | 1                |         |
| Age         |       |               |                  |                  |         |
| 55 >        | 244   | 113 (46%)     | 0.65 [0.42–1.00] | 0.81 [0.66–0.99] | 0.0635  |
| 55 ≤        | 128   | 73 (57%)      | 1                | 1                |         |
| 65 >        | 135   | 60 (44%)      | 0.70 [0.46–1.08] | 0.84 [0.67–1.05] | 0.1311  |
| 65 ≤        | 237   | 126 (53%)     | 1                | 1                |         |
| Tumor stage |       |               |                  |                  |         |
| I–II        | 258   | 117 (45%)     | 0.46 [0.28–0.75] | 0.70 [0.57–0.86] | 0.0027  |
| III–        | 90    | 58 (64%)      | 1                | 1                |         |

OR = Odds Ratio; RR = Relative Risk; 95%CI = 95% confidence intervals; p-value = Chi-Square Pearson p-value.

**Table S3.** Univariate analysis of variables associated with KIF gene set (KIF2C, KIF18B, and KIF20A) activity in TCGA LIHC cohort.

| Variable    | Total | E2F1_High (%) | OR [95%CI]       | RR [95%CI]       | p-value |
|-------------|-------|---------------|------------------|------------------|---------|
| Sex         |       |               |                  |                  |         |
| male        | 251   | 116 (46%)     | 0.63 [0.40–0.97] | 0.80 [0.65–0.98] | 0.0464  |
| female      | 121   | 70 (58%)      | 1                | 1                |         |
| Age         |       |               |                  |                  |         |
| 55 >        | 247   | 115 (47%)     | 0.66 [0.43–1.02] | 0.82 [0.67–1.00] | 0.0790  |
| 55 ≤        | 125   | 71 (57%)      | 1                | 1                |         |
| 65 >        | 138   | 57 (41%)      | 0.57 [0.37–0.88] | 0.75 [0.60–0.94] | 0.0136  |
| 65 ≤        | 234   | 129 (55%)     | 1                | 1                |         |
| Tumor stage |       |               |                  |                  |         |
| I–II        | 258   | 118 (46%)     | 0.47 [0.28–0.76] | 0.71 [0.58–0.87] | 0.0033  |
| III–        | 90    | 58 (64%)      | 1                | 1                |         |

OR = Odds Ratio; RR = Relative Risk; 95%CI = 95% confidence intervals; p-value = Chi-Square Pearson p-value.

**Table S4.** List of the primers' sequences.

| Gene   | Primers | Sequences (5'-3')                    |
|--------|---------|--------------------------------------|
| ACTB   | F       | 5'-GCA AAG ACC TGT ACG CCA AC-3'     |
|        | R       | 5'-GGA GCA ATG ATC TTG ATC TTC A-3'  |
| E2F1   | F       | 5'-CCA GGA GGT CAC TTC TGA GG-3'     |
|        | R       | 5'-ACA ACA GCG GTT CTT GCT C-3'      |
| EMC7   | F       | 5'-ACA TGA GAC GGG AAA TGG AG-3'     |
|        | R       | 5'-CCC CAC TTT TGC CTG TTT TA-3'     |
| KIF18A | F       | 5'-ATG TGG ACA GGA GGA CTT GG-3'     |
|        | R       | 5'-GAA GAA GGA TCA AGC CGT TG-3'     |
| KIF18B | F       | 5'-TTC AGA GTC AAT CCC TGT GC-3'     |
|        | R       | 5'-GAT TCC CAG GGT GTG CAG-3'        |
| KIF20A | F       | 5'-CAT CTT AAT CAA ACA GGA CCA GA-3' |
|        | R       | 5'-AGA AAC CTG GCC TTG GAG TT-3'     |
| KIF23  | F       | 5'-CCA AAT GGT AGT CGA AAA CG-3'     |
|        | R       | 5'-CTC TCA TCT CCA CAG CCA CA-3'     |
| KIF2C  | F       | 5'-TCC AGG CAA TTT ATC CAA GG-3'     |
|        | R       | 5'-CCA GTC TGG TCC TTG CTG TA-3'     |
| KNSTRN | F       | 5'-TGT CAG AAA AGG CTA CAA ACC A-3'  |
|        | R       | 5'-GGG TCA GGT CCT TCA GCT CT-3'     |
| MCT4   | F       | 5'-CTT CGG GAG GCA AAC TCC T-3'      |
|        | R       | 5'-TGG GCT TCT TCC TAA TGC AG-3'     |
| NDC80  | F       | 5'-TGA AAA ATG TGC CAG TGA GC-3'     |
|        | R       | 5'-GTT GGT ATT CCC GCT GAA CA-3'     |

|        |   |                                       |
|--------|---|---------------------------------------|
| NUASP1 | F | 5'-GCT TCT ACT CCC ATC AGC CA-3'      |
|        | R | 5'-CTG AAA ACC TGA CAC CCG TT-3'      |
| NUF2   | F | 5'-AAG AGG TGC TGT CTA TGA ACG A-3'   |
|        | R | 5'-AAA TAT TTC CTG GGA CTT CAG TTT-3' |
| PRC1   | F | 5'-GCA AGA TCA AGA ACT GTG CG-3'      |
|        | R | 5'-TCA CGC CTA GAA GCC TTT GT-3'      |
| STMN1  | F | 5'-AAG ACG CAA GTC CCA TGA AG-3'      |
|        | R | 5'-GCT TCC ATT TTG TGG GTC AG-3'      |

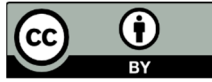

© 2019 by the authors. Licensee MDPI, Basel, Switzerland. This article is an open access article distributed under the terms and conditions of the Creative Commons Attribution (CC BY) license (<http://creativecommons.org/licenses/by/4.0/>).
